# Supplementary material
Source: PubMed Central journal article supplement (PMC5029964)

## An Open and Shut Case: The Interaction of Magnesium with MST Enzymes

Kathleen M. Meneely, Jesse A. Sundlov, Andrew M. Gulick, Graham R. Moran and Audrey L. Lamb

**Supplemental Figure:** Below are the binding isotherms that were used to determine the dissociation constants that are shown in the tables of Figure 6 and Figure 9. The color coding is the same as in the manuscript proper: PchA = red; EntC = green; Irp9 = blue. Error bars are not visible, because they are smaller than the markers.

E•chorismate (Irp9 binding isotherm is Figure 6B)

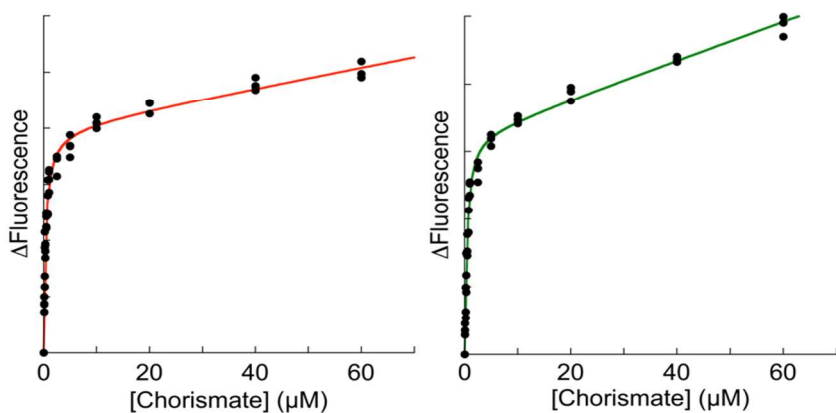

E•isochorismate

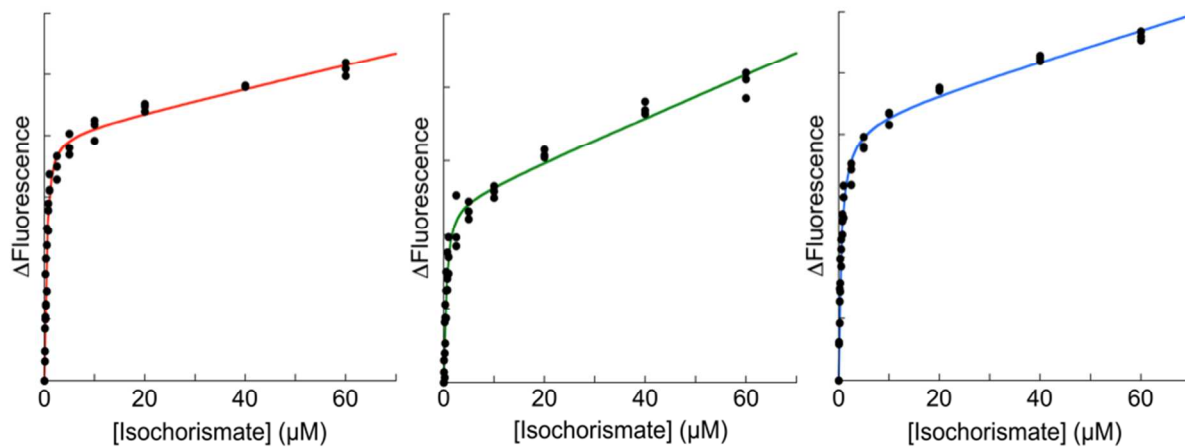

Irp9•salicylate

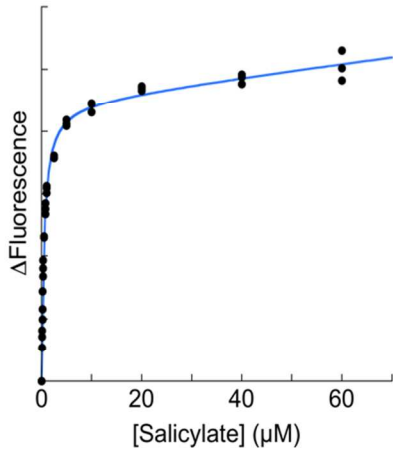

Irp9•pyruvate

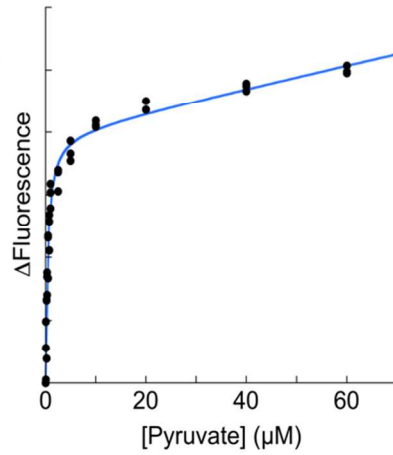

E•Mg(II) (Irp9 binding isotherm is Figure 6C)

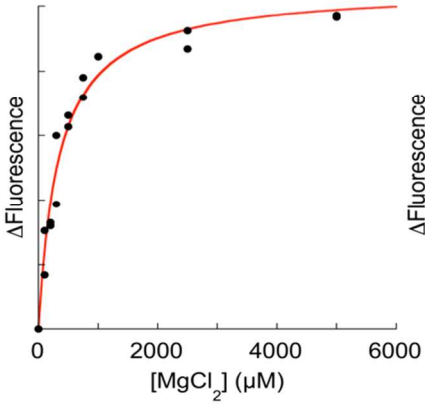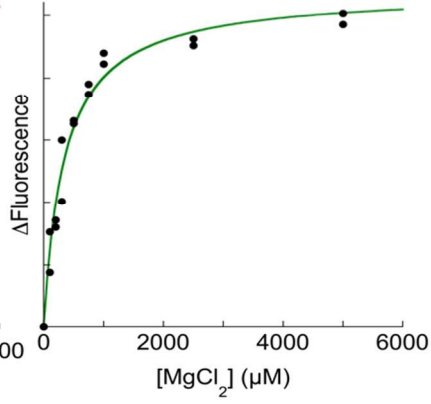

E•Fe(II)

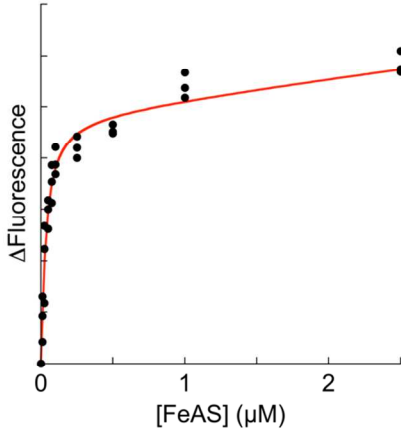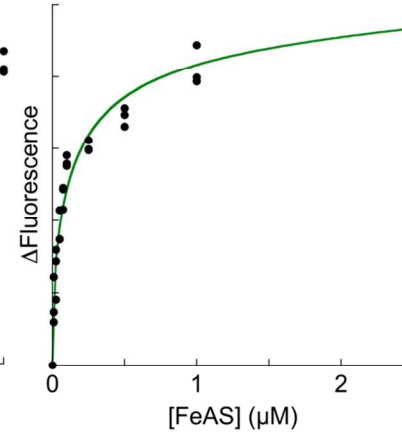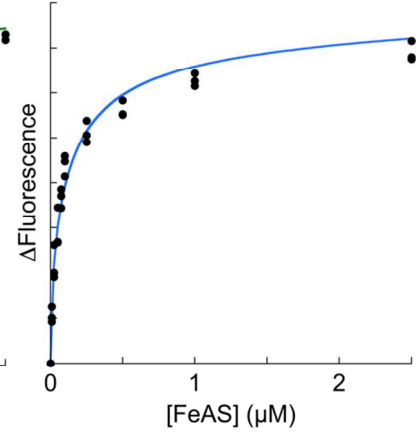

Supplement: ja6b05134_si_001.pdf [file ja6b05134_si_001.pdf]
